# Supplementary material for: Hydrodistillation and Microwave Extraction of Volatile Compounds: Comparing Data for Twenty-One Veronica Species from Different Habitats
Source: MDPI journal article supplement (doi:10.3390/plants11070902), 2022-03-28
Supplement: s1 [file s1]

**Table S4.** Chemical composition of the VCs obtained by microwave extraction from the aerial parts of *Veronica* taxa collected on wet habitats.

| Table S1. Chemical composition of the VOs obtained by microwave extraction from the aerial parts of <i>V. officinalis</i> L. collected in wet habitats. |                              |                 |              |                        |                      |                    |                      |
|---------------------------------------------------------------------------------------------------------------------------------------------------------|------------------------------|-----------------|--------------|------------------------|----------------------|--------------------|----------------------|
|                                                                                                                                                         | <i>V. anagallis-aquatica</i> |                 |              | <i>V. anagalloides</i> | <i>V. beccabunga</i> | <i>V. catenata</i> | <i>V. longifolia</i> |
| Component                                                                                                                                               | RI <sup>a</sup>              | RI <sup>b</sup> | VC±SD        | VC±SD                  | VC±SD                | VC±SD              | VC±SD                |
| <b>Oxygenated monoterpenes</b>                                                                                                                          |                              |                 | <b>12.52</b> | <b>4.82</b>            | <b>30.1</b>          | <b>-</b>           | <b>-</b>             |
| 1,8-Cineole                                                                                                                                             | 1026                         | 1210            | 0.46±0.01    | -                      | -                    | -                  | -                    |
| γ-Terpinene                                                                                                                                             | 1057                         | 1225            | 7.58±0.01    | 3..81±0.01             | -                    | -                  | -                    |
| Linalool                                                                                                                                                | 1095                         | 1506            | 0.71±0.01    | -                      | -                    | -                  | -                    |
| Camphor                                                                                                                                                 | 1151                         | 1499            | 0.91±0.01    | -                      | -                    | -                  | -                    |
| Terpinen-4-ol                                                                                                                                           | 1174                         | 1686            | -            | 1.01±0.04              | -                    | -                  | -                    |
| <i>trans-p</i> -Mentha-1(7),8-dien-2-ol                                                                                                                 | 1187                         | 1803            | 1.78±0.01    | -                      | 0.82±0.01            | -                  | -                    |
| Piperitone                                                                                                                                              | 1250                         | 1719            | -            | -                      | 29.28±0.01           | -                  | -                    |
| Menthyl acetate                                                                                                                                         | 1294                         | 1550            | 1.08±0.01    | -                      | -                    | -                  | -                    |
| <b>Sesquiterpene hydrocarbons</b>                                                                                                                       |                              |                 | <b>5.1</b>   | <b>10.16</b>           | <b>3.69</b>          | <b>2.67</b>        | <b>2.98</b>          |
| <i>E</i> -Caryophyllene*                                                                                                                                | 1424                         | 1585            | 3.29±0.01    | 4.01±0.01              | 2.95 ±0.04           | 2.48±0.01          | 1.43±0.01            |
| <i>allo</i> -Aromadendrene                                                                                                                              | 1465                         | 1662            | -            | 2.11±0.01              | 0.32±0.02            | 0.19±0.01          | 1.55±0.01            |
| Germacrene D                                                                                                                                            | 1481                         | 1692            | 0.88±0.01    | 3.07±0.01              | 0.42±0.01            | -                  | -                    |
| δ-Selinene                                                                                                                                              | 1492                         | 1756            | 0.22±0.04    | 0.97±0.01              | -                    | -                  | -                    |
| δ-Cadinene                                                                                                                                              | 1517                         | 1745            | 0.71±0.01    | -                      | -                    | -                  | -                    |
| <b>Oxygenated sesquiterpenes</b>                                                                                                                        |                              |                 | <b>29.45</b> | <b>31.19</b>           | <b>11.18</b>         | <b>24.39</b>       | <b>12.37</b>         |
| Spathulenol                                                                                                                                             | 1577                         | 2101            | 0.65±0.01    | -                      | -                    | 0.65±0.1           | 0.81±0.01            |
| Caryophyllene oxide*                                                                                                                                    | 1581                         | 1955            | 2.55±0.01    | 8.58±0.01              | 1.62±0.01            | 6.52±0.01          | 1.53±0.01            |
| Viridiflorol                                                                                                                                            | 1592                         | 2099            | -            | 0.81±0.01              | -                    | -                  | 0.75±0.01            |
| α-Bisabolol                                                                                                                                             | 1685                         | 2210            | 0.28±0.01    | 1.91±0.01              | -                    | -                  | -                    |

|                                    |      |      |              |              |              |              |              |
|------------------------------------|------|------|--------------|--------------|--------------|--------------|--------------|
| $\alpha$ -Bisabolol oxide          | 1748 | 2511 | -            | 0.77±0.02    | -            | -            | -            |
| Hexahydrofarnesyl acetone*         | 1839 | 2113 | 25.97±0.01   | 19.12±0.01   | 9.56±0.01    | 17.22±0.01   | 9.28±0.01    |
| <b>Oxygenated diterpene</b>        |      |      | <b>14.56</b> | <b>14.88</b> | <b>34.54</b> | <b>42.26</b> | <b>37.18</b> |
| Phytol*                            | 1942 | 2610 | 14.56±0.01   | 14.88±0.01   | 34.54±0.01   | 42.26±0.01   | 37.18±0.01   |
| <b>Phenolic compounds</b>          |      |      | <b>3.43</b>  | <b>0.33</b>  | <b>-</b>     | <b>-</b>     | <b>-</b>     |
| Methyl eugenol                     | 1403 | 2005 | 3.43±0.01    | 0.33±0.07    | -            | -            | -            |
| <b>Acids, alcohols and esters</b>  |      |      | <b>25.93</b> | <b>18.17</b> | <b>9.54</b>  | <b>12.98</b> | <b>30.01</b> |
| Isopentyl acetate                  | 863  | 1127 | -            | -            | -            | -            | 0.22±0.03    |
| Benzaldehyde                       | 952  | 1508 | 1.63±0.01    | -            | -            | -            | -            |
| Benzene acetaldehyde               | 1036 | 1633 | 9.67±0.01    | -            | 2.48±0.01    | -            | 4.17±0.01    |
| <i>n</i> -Nonanal                  | 1100 | 1389 | 1.82±0.01    | 2.12±0.01    | 0.89±0.02    | -            | 2.68±0.01    |
| Hexyl 2-methyl butanoate           | 1233 | 1425 | -            | 0.44±0.01    | -            | -            | -            |
| <i>n</i> -Decanol                  | 1266 | 1711 | 1.28±0.01    | -            | -            | -            | 0.58±0.01    |
| 2,4-Decadienal                     | 1304 | 1764 | 0.28±0.05    | -            | -            | -            | -            |
| ( <i>E</i> )- $\beta$ -Damascenone | 1384 | 1819 | 0.12±0.16    | 0.52±0.07    | -            | 0.32±0.09    | -            |
| $\beta$ -Ionone                    | 1487 | 1935 | 6.36±0.01    | 4.22±0.01    | 1.43±0.01    | 0.27±0.01    | 16.22±0.01   |
| Hexadecanoic acid*                 | 1959 | 2912 | 4.77±0.01    | 9.17±0.01    | 4.74±0.01    | 5.81±0.01    | 6.14±0.01    |
| Oleic acid                         | 2133 | 2998 | -            | 1.02±0.01    | -            | 2.25±0.01    | -            |
| Octadecanol acetate                | 2209 | -    | -            | 0.68±0.03    | -            | 4.33±0.01    | -            |
| <b>Hydrocarbons</b>                |      |      | <b>5.3</b>   | <b>18.12</b> | <b>8.26</b>  | <b>15.1</b>  | <b>10.71</b> |
| Eicosane*                          | 2000 | 2000 | 0.72±0.01    | 1.12±0.01    | -            | -            | -            |
| Heneicosane*                       | 2100 | 2100 | 0.18±0.01    | 0.33±0.04    | -            | -            | -            |
| Docosane*                          | 2200 | 2200 | 2.22±0.01    | 5.62±0.01    | 4.15±0.01    | -            | 2.82±0.01    |

|                                 |      |      |              |              |              |             |              |
|---------------------------------|------|------|--------------|--------------|--------------|-------------|--------------|
| Tricosane*                      | 2300 | 2300 | 0.75±0.01    | -            | -            | 3.03±0.01   | -            |
| Tetracosane*                    | 2400 | 2400 | 1.15±0.01    | -            | -            | 12.07±0.01  | -            |
| Pentacosane*                    | 2500 | 2500 | -            | 5.43±0.01    | 1.13±0.01    | -           | 4.71±0.01    |
| Hexacosane*                     | 2600 | 2600 | -            | 3.90±0.01    | 0.27±0.09    | -           | 1.48±0.01    |
| Heptacosane*                    | 2700 | 2700 | 0.28±0.1     | 0.95±0.01    | 1.45±0.01    | -           | 1.70±0.01    |
| Octacosane*                     | 2800 | 2800 | -            | 0.77±0.15    | 1.26±0.01    | -           | -            |
| <b>Total identification (%)</b> |      |      | <b>97.29</b> | <b>96.79</b> | <b>97.31</b> | <b>97.4</b> | <b>93.25</b> |

Retention indices (RIs) were determined relative to a series of n-alkanes (C8–C40) on capillary columns VF5-ms (RI<sup>a</sup>) and CPWax 52 (RI<sup>b</sup>); Identification method: RI, comparison of RIs with those in a self-generated library reported in the literature [41] and/or with authentic samples; comparison of mass spectra with those in the NIST02 and Wiley 9 mass spectral libraries; \*co-injection with reference compounds; -, not identified; SD, standard deviation of triplicate analysis.
