# Supplementary material for: Hydrodistillation and Microwave Extraction of Volatile Compounds: Comparing Data for Twenty-One Veronica Species from Different Habitats
Source: MDPI journal article supplement (doi:10.3390/plants11070902), 2022-03-28
Supplement: s1 [file s1]

**Table S6.** Chemical composition of the VCs obtained by microwave extraction from the aerial parts of *Veronica* taxa collected on moderate habitats.

|                                         |                 |                 | <i>V. acinifolia</i> | <i>V. arvensis</i> | <i>V. chamaedrys</i> | <i>V. hederifolia</i> | <i>V. montana</i> | <i>V. officinalis</i> |
|-----------------------------------------|-----------------|-----------------|----------------------|--------------------|----------------------|-----------------------|-------------------|-----------------------|
| Component                               | RI <sup>a</sup> | RI <sup>b</sup> | VC±SD                | VC±SD              | VC±SD                | VC±SD                 | VC±SD             | VC±SD                 |
| <b>Monoterpene hydrocarbons</b>         |                 |                 | -                    | <b>1.57</b>        | -                    | <b>2.82</b>           | -                 | -                     |
| $\alpha$ -Thujene                       | 924             | 1012            | -                    | -                  | -                    | 2.82±0.01             | -                 | -                     |
| $\beta$ -Phellandrene                   | 1002            | 1195            | -                    | 1.57±0.01          | -                    | -                     | -                 | -                     |
| <b>Oxygenated monoterpenes</b>          |                 |                 | -                    | <b>0.93</b>        | <b>0.76</b>          | -                     | -                 | -                     |
| Terpinen-4-ol                           | 1174            | 1686            | -                    | -                  | 0.76±0.01            | -                     | -                 | -                     |
| <i>trans-p</i> -Mentha-1(7),8-dien-2-ol | 1187            | 1803            | -                    | 0.93±0.01          | -                    | -                     | -                 | -                     |
| <b>Sesquiterpene hydrocarbons</b>       |                 |                 | <b>8.55</b>          | <b>9.66</b>        | <b>2.36</b>          | <b>1.26</b>           | <b>0.44</b>       | <b>4.77</b>           |
| <i>E</i> -Caryophyllene*                | 1424            | 1585            | 6.51±0.01            | 3.25±0.01          | 1.05 ±0.01           | 1.10±0.01             | 0.44±0.01         | 3.12±0.01             |
| <i>allo</i> -Aromadendrene              | 1465            | 1662            | 0.21±0.07            | 1.81±0.01          | 0.82±0.01            | 0.16±0.01             | -                 | 1.65±0.01             |
| Germacrene D                            | 1481            | 1692            | 1.83±0.01            | 2.45±0.01          | 0.12±0.01            | -                     | -                 | -                     |
| $\delta$ -Selinene                      | 1492            | 1756            | -                    | 1.22±0.01          | 0.37±0.01            | -                     | -                 | -                     |
| $\delta$ -Cadinene                      | 1517            | 1745            | -                    | 0.93±0.01          | -                    | -                     | -                 | -                     |
| <b>Oxygenated sesquiterpenes</b>        |                 |                 | <b>23.99</b>         | <b>26.98</b>       | <b>18.8</b>          | <b>59.66</b>          | <b>13.64</b>      | <b>12.04</b>          |
| Spathulenol                             | 1577            | 2101            | 0.25±0.01            | -                  | -                    | -                     | -                 | -                     |
| Caryophyllene oxide*                    | 1581            | 1955            | 5.52±0.01            | 7.11±0.01          | 1.22±0.01            | 0.51±0.06             | 2.61±0.01         | 4.15±0.01             |
| Viridiflorol                            | 1592            | 2099            | -                    | -                  | 0.12±0.03            | -                     | -                 | -                     |
| $\gamma$ -Eudesmol                      | 1632            | 2175            | -                    | 2.32±0.01          | 0.77±0.01            | -                     | -                 | -                     |
| $\alpha$ -Cadinol                       | 1655            | 2208            | -                    | -                  | -                    | -                     | 0.69±0.01         | -                     |
| $\alpha$ -Bisabolol                     | 1685            | 2210            | 1.78±0.01            | -                  | -                    | -                     | 0.72±0.01         | 0.22±0.01             |
| $\alpha$ -Bisabolol oxide               | 1748            | 2511            | 0.27±0.01            | -                  | -                    | -                     | 0.45±0.01         | 0.85±0.01             |

|                                    |      |      |              |              |              |              |              |              |
|------------------------------------|------|------|--------------|--------------|--------------|--------------|--------------|--------------|
| Hexahydrofarnesyl acetone*         | 1839 | 2113 | 16.17±0.01   | 17.55±0.01   | 16.69±0.01   | 59.15±0.01   | 9.17±0.01    | 6.82±0.01    |
| <b>Oxygenated diterpene</b>        |      |      | <b>39.88</b> | <b>22.57</b> | <b>18.88</b> | <b>14.58</b> | <b>37.03</b> | <b>16.89</b> |
| Phytol*                            | 1942 | 2610 | 39.88±0.01   | 22.57±0.01   | 18.88±0.01   | 14.58±0.01   | 37.03±0.01   | 16.89±0.01   |
| <b>Phenolic compounds</b>          |      |      | <b>1.06</b>  | <b>1.97</b>  | <b>2.12</b>  | -            | -            | -            |
| <i>p</i> -Vinyl guaicol            | 1313 | 2156 | 0.58±0.01    | 1.51±0.01    | 0.84±0.01    | -            | -            | -            |
| Methyl eugenol                     | 1403 | 2005 | 0.48±0.01    | 0.46±0.06    | 0.57±0.01    | -            | -            | -            |
| ( <i>Z</i> )-Methyl isoeugenol     | 1451 | 2070 | -            | -            | 0.71±0.01    | -            | -            | -            |
| <b>Acids, alcohols and esters</b>  |      |      | <b>11.45</b> | <b>26.71</b> | <b>22.16</b> | <b>16.6</b>  | <b>17.51</b> | <b>52.59</b> |
| Isopentyl acetate                  | 863  | 1127 | -            | -            | -            | -            | -            | 1.04±0.01    |
| 3-Hexen-1-ol                       | 873  | 1383 |              | -            | -            | -            | -            | 22.04±0.01   |
| Benzaldehyde                       | 952  | 1508 | -            | 3.12±0.01    | -            | -            | 0.91±0.04    | -            |
| 2-Pentyl furan                     | 984  | 1230 | -            | 0.51±0.01    | -            | -            | -            | -            |
| Benzene acetaldehyde               | 1036 | 1633 | -            | 1.24±0.01    | 3.22±0.01    | -            | 2.31±0.01    | -            |
| <i>n</i> -Nonanal                  | 1100 | 1389 | 1.46±0.01    | 2.31±0.01    | 0.85±0.1     | -            | -            | 6.72±0.01    |
| Hexyl 2-methyl butanoate           | 1233 | 1425 | 0.24±0.01    | -            | 0.75±0.1     | -            | -            | 1.61±0.01    |
| <i>n</i> -Decanol                  | 1266 | 1711 | 0.45±0.01    | -            | 0.32±0.1     | -            | -            | -            |
| 2,4-Decadienal                     | 1304 | 1764 | 0.53±0.01    | -            | -            | -            | -            | -            |
| ( <i>E</i> )- $\beta$ -Damascenone | 1384 | 1819 | 0.16±0.01    | 0.82±0.01    | 0.42±0.01    | -            | 0.31±0.01    | 0.99±0.03    |
| $\beta$ -Ionone                    | 1487 | 1935 | 4.09±0.01    | 7.29±0.01    | 0.77±0.01    | 15.03±0.01   | 7.68±0.01    | 7.79±0.01    |
| Hexadecanoic acid*                 | 1959 | 2912 | 4.52±0.01    | 17.42±0.01   | 15.83±0.01   | 1.57±0.01    | 5.81±0.01    | 12.40±0.01   |
| <b>Hydrocarbons</b>                |      |      | <b>7.59</b>  | <b>3.03</b>  | <b>32.67</b> | <b>0.68</b>  | <b>25.04</b> | <b>7.19</b>  |
| Heneicosane*                       | 2100 | 2100 | -            | 0.58±0.07    | -            | .            | 1.48±0.07    | -            |
| Docosane*                          | 2200 | 2200 | 1.42±0.01    | 1.68±0.01    | 12.13±0.01   | 0.68±0.01    | 3.13±0.02    | 0.92±0.01    |

|                                 |      |      |              |              |              |             |              |              |
|---------------------------------|------|------|--------------|--------------|--------------|-------------|--------------|--------------|
| Tricosane*                      | 2300 | 2300 | 0.42±0.01    | 0.77±0.01    | 0.15±0.07    | -           | 0.88±0.01    | -            |
| Tetracosane*                    | 2400 | 2400 | -            | -            | 5.55±0.01    | -           | 0.95±0.01    | -            |
| Pentacosane*                    | 2500 | 2500 | 5.75±0.01    | -            | 8.36±0.01    | -           | 14.90±0.01   | 0.15±0.03    |
| Hexacosane*                     | 2600 | 2600 | -            | -            | 0.13±0.02    | -           | -            | 0.54±0.01    |
| Heptacosane*                    | 2700 | 2700 | -            | -            | 5.22±0.01    | -           | 3.70±0.01    | 5.52±0.01    |
| Octacosane*                     | 2800 | 2800 | -            | -            | 1.13±0.01    | -           | -            | 0.06±0.01    |
| <b>Total identification (%)</b> |      |      | <b>92.52</b> | <b>93.42</b> | <b>97.75</b> | <b>95.6</b> | <b>93.66</b> | <b>93.48</b> |

**Table 6.** Continue

|                                   |                 |                 | <i>V. opaca</i> | <i>V. persica</i> | <i>V. polita</i> | <i>V. serpyllifolia</i> | <i>V. urticifolia</i> |
|-----------------------------------|-----------------|-----------------|-----------------|-------------------|------------------|-------------------------|-----------------------|
| Component                         | RI <sup>a</sup> | RI <sup>b</sup> | VC±SD           | VC±SD             | VC±SD            | VC±SD                   | VC±SD                 |
| <b>Oxygenated monoterpenes</b>    |                 |                 | -               | -                 | -                | <b>0.86</b>             | -                     |
| Linalool                          | 1095            | 1506            | -               | -                 | -                | 0.86±0.01               | -                     |
| <b>Sesquiterpene hydrocarbons</b> |                 |                 | <b>11.55</b>    | <b>6.08</b>       | <b>6.03</b>      | <b>14.4</b>             | <b>0.69</b>           |
| $\alpha$ -Copaene                 | 1377            | 1484            | -               | -                 | -                | 1.61±0.01               | -                     |
| $\beta$ -Elemene                  | 1389            | 1593            | -               | 1.29±0.01         | 1.16±0.01        | 2.29±0.01               | -                     |
| <i>E</i> -Caryophyllene*          | 1424            | 1585            | 8.62±0.01       | 2.62±0.01         | 4.17 ±0.01       | 6.83±0.01               | 0.14±0.01             |
| <i>allo</i> -Aromadendrene        | 1465            | 1662            | 0.85±0.01       | 0.82±0.05         | 0.52±0.02        | -                       | -                     |
| $\beta$ -Chamigrene               | 1478            | 1724            | -               | 0.17±0.01         | -                | -                       | -                     |
| Germacrene D                      | 1481            | 1692            | 0.53±0.01       | 0.35±0.01         | 0.07±0.01        | 3.24±0.01               | 0.55±0.01             |
| $\delta$ -Selinene                | 1492            | 1756            | 1.55±0.01       | 0.83±0.01         | 0.11±0.01        | 0.43±0.01               | -                     |
| <b>Oxygenated sesquiterpenes</b>  |                 |                 | <b>13.37</b>    | <b>23.7</b>       | <b>15.88</b>     | <b>27.92</b>            | <b>13.71</b>          |

|                                   |      |      |              |              |              |              |              |
|-----------------------------------|------|------|--------------|--------------|--------------|--------------|--------------|
| Spathulenol                       | 1577 | 2101 | -            | -            | -            | 1.25±0.01    | -            |
| Caryophyllene oxide*              | 1581 | 1955 | 6.75±0.01    | 3.14±0.01    | 1.48±0.01    | 14.74±0.01   | 0.49±0.04    |
| Viridiflorol                      | 1592 | 2099 | -            | -            | 0.44±0.01    | -            | -            |
| γ-Eudesmol                        | 1632 | 2175 | 2.62±0.01    | 1.22±0.01    | -            | 2.52±0.01    | -            |
| α-Muurolol                        | 1645 | 2181 | 0.75±0.01    | -            | -            | -            | -            |
| α-Cadinol                         | 1655 | 2208 | 0.42±0.01    | -            | -            | 0.82±0.01    | -            |
| α-Bisabolol                       | 1685 | 2210 | 2.02±0.01    | 0.63±0.01    | 1.41±0.01    | 1.21±0.01    | -            |
| α-Bisabolol oxide                 | 1748 | 2511 | 0.81±0.03    | 0.24±0.07    | 1.73±0.01    | 0.84±0.01    | -            |
| Hexahydrofarnesyl acetone*        | 1839 | 2113 | 5.87±0.01    | 18.47±0.01   | 10.82±0.01   | 6.54±0.01    | 13.22±0.01   |
| <b>Oxygenated diterpene</b>       |      |      | <b>23.18</b> | <b>23.71</b> | <b>19.88</b> | <b>18.72</b> | <b>31.12</b> |
| Phytol*                           | 1942 | 2610 | 23.18±0.01   | 23.71±0.01   | 19.88±0.01   | 18.72±0.01   | 31.12±0.01   |
| <b>Phenolic compounds</b>         |      |      | <b>-</b>     | <b>1.7</b>   | <b>0.45</b>  | <b>2.89</b>  | <b>-</b>     |
| <i>p</i> -Vinyl guaicol           | 1313 | 2156 | -            | 0.74±0.01    | 0.45±0.01    | 1.64±0.01    | -            |
| Methyl eugenol                    | 1403 | 2005 | -            | 0.95±0.01    | -            | 1.25±0.01    | -            |
| <b>Acids, alcohols and esters</b> |      |      | <b>35.19</b> | <b>14.24</b> | <b>8.64</b>  | <b>18.6</b>  | <b>31.01</b> |
| Benzaldehyde                      | 952  | 1508 | 1.16±0.01    | 0.39±0.01    | -            | 0.85±0.01    | 0.49±0.01    |
| 1-Octen-3-ol                      | 974  | 1433 | -            | -            | -            | -            | 1.67±0.01    |
| Benzene acetaldehyde              | 1036 | 1633 | 2.09±0.01    | 2.05±0.01    | 0.46±0.01    | 1.25±0.01    | 7.65±0.03    |
| <i>n</i> -Nonanal                 | 1100 | 1389 | 1.64±0.01    | 1.06±0.02    | 0.51±0.01    | 1.28±0.01    | 0.42±0.05    |
| 2,4-Decadienal                    | 1304 | 1764 | -            | 0.34±0.03    | -            | -            | -            |
| ( <i>E</i> )-β-Damascenone        | 1384 | 1819 | 2.51±0.01    | 0.55±0.01    | 0.65±0.01    | 1.56±0.01    | 0.16±0.01    |
| β-Ionone                          | 1487 | 1935 | 7.52±0.01    | 4.54±0.01    | 1.33±0.01    | 5.74±0.01    | 4.51±0.01    |
| Benzyl benzoate                   | 1760 | 2613 | 0.59±0.01    | -            | -            | -            | -            |

|                                 |      |      |              |              |              |              |              |
|---------------------------------|------|------|--------------|--------------|--------------|--------------|--------------|
| Hexadecanoic acid*              | 1959 | 2912 | 19.68±0.01   | 5.31±0.01    | 5.69±0.01    | 7.71±0.01    | 16.11±0.01   |
| Oleic acid                      | 2133 | 2998 | -            | -            | -            | 0.21±0.01    | -            |
| <b>Hydrocarbons</b>             |      |      | <b>9.2</b>   | <b>26.61</b> | <b>42.53</b> | <b>10.05</b> | <b>21.26</b> |
| Eicosane*                       | 2000 | 2000 | 0.29±0.15    | 1.51±0.01    | 0.30±0.01    | -            | -            |
| Heneicosane*                    | 2100 | 2100 | 0.59±0.02    | 0.32±0.05    | 0.13±0.15    | -            | .            |
| Docosane*                       | 2200 | 2200 | 3.48±0.01    | 2.85±0.01    | 2.45±0.01    | 4.20±0.01    | 2.76±0.01    |
| Tricosane*                      | 2300 | 2300 | 0.76±0.01    | 0.14±0.01    | 0.37±0.02    | 0.30±0.03    | 0.18±0.01    |
| Tetracosane*                    | 2400 | 2400 | -            | 0.84±0.02    | 0.89±0.01    | 2.59±0.01    | 2.71±0.01    |
| Pentacosane*                    | 2500 | 2500 | -            | 5.27±0.01    | 1.76±0.01    | 0.18±0.07    | 8.91±0.01    |
| Hexacosane*                     | 2600 | 2600 | 0.44±0.05    | 0.17±0.15    | 4.55±0.01    | 2.74±0.01    | 0.53±0.04    |
| Heptacosane*                    | 2700 | 2700 | 0.75±0.03    | 14.28±0.01   | 15.13±0.01   | -            | 5.75±0.01    |
| Octacosane*                     | 2800 | 2800 | 2.89±0.01    | 1.23±0.01    | 16.95±0.02   | -            | 0.42±0.05    |
| <b>Total identification (%)</b> |      |      | <b>92.49</b> | <b>96.04</b> | <b>93.41</b> | <b>93.44</b> | <b>97.79</b> |

Retention indices (RIs) were determined relative to a series of n-alkanes (C8–C40) on capillary columns VF5-ms (RI<sup>a</sup>) and CPWax 52 (RI<sup>b</sup>); Identification method: RI, comparison of RIs with those in a self-generated library reported in the literature [41] and/or with authentic samples; comparison of mass spectra with those in the NIST02 and Wiley 9 mass spectral libraries; \*co-injection with reference compounds; -, not identified; SD, standard deviation of triplicate analysis.
