# Supplementary material for: Hydrodistillation and Microwave Extraction of Volatile Compounds: Comparing Data for Twenty-One Veronica Species from Different Habitats
Source: MDPI journal article supplement (doi:10.3390/plants11070902), 2022-03-28
Supplement: s1 [file s1]

**Table S5.** Chemical composition of the VCs obtained by hydro-distillation from the aerial parts of *Veronica* taxa collected on moderate habitats.

|                                         |                 |                 | <i>V. acinifolia</i> | <i>V. arvensis</i> | <i>V. chamaedrys</i> | <i>V. hederifolia</i> | <i>V. montana</i> | <i>V. officinalis</i> |
|-----------------------------------------|-----------------|-----------------|----------------------|--------------------|----------------------|-----------------------|-------------------|-----------------------|
| Component                               | RI <sup>a</sup> | RI <sup>b</sup> | VC±SD                | VC±SD              | VC±SD                | VC±SD                 | VC±SD             | VC±SD                 |
| <b>Monoterpene hydrocarbons</b>         |                 |                 | -                    | -                  | -                    | <b>4.86</b>           | -                 | -                     |
| $\alpha$ -Thujene                       | 924             | 1012            | -                    | -                  | -                    | 4.86±0.01             | -                 | -                     |
| <b>Oxygenated monoterpenes</b>          |                 |                 | <b>0.75</b>          | <b>1.2</b>         | <b>3.26</b>          | <b>0.98</b>           | -                 | -                     |
| Terpinen-4-ol                           | 1174            | 1686            | 0.75±0.1             | -                  | 1.49±0.01            | -                     | -                 | -                     |
| $\alpha$ -Terpineol                     | 1184            | 1660            | -                    | -                  | 0.92±0.01            | 0.98±0.15             | -                 | -                     |
| <i>trans-p</i> -Mentha-1(7),8-dien-2-ol | 1187            | 1803            | -                    | 0.52±0.01          | 0.85±0.01            | -                     | -                 | -                     |
| Hexyl 2-methyl butanoate                | 1233            | 1425            | -                    | 0.68±0.05          | -                    | -                     | -                 | -                     |
| <b>Sesquiterpene hydrocarbons</b>       |                 |                 | <b>6.73</b>          | <b>12.44</b>       | <b>5.58</b>          | <b>9.19</b>           | <b>0.7</b>        | <b>3.77</b>           |
| <i>E</i> -Caryophyllene*                | 1424            | 1585            | 4.46±0.01            | 6.21±0.01          | 2.43 ±0.01           | 4.11±0.01             | 0.13±0.01         | 3.12±0.01             |
| <i>allo</i> -Aromadendrene              | 1465            | 1662            | 0.89±0.05            | 0.85±0.01          | 0.82±0.01            | 2.26±0.01             | 0.57±0.01         | 0.65±0.01             |
| $\beta$ -Chamigrene                     | 1478            | 1724            | -                    | 0.77±0.03          | -                    | -                     | -                 | -                     |
| Germacrene D                            | 1481            | 1692            | 0.43±0.01            | 1.25±0.03          | 1.02±0.01            | 1.47±0.03             | -                 | -                     |
| $\delta$ -Selinene                      | 1492            | 1756            | 0.95±0.01            | 2.01±0.01          | 1.31±0.15            | 1.35±0.04             | -                 | -                     |
| $\delta$ -Cadinene                      | 1517            | 1745            | -                    | 1.35±0.01          | -                    | -                     | -                 | -                     |
| <b>Oxygenated sesquiterpenes</b>        |                 |                 | <b>28.92</b>         | <b>40.44</b>       | <b>18.54</b>         | <b>37.18</b>          | <b>14.14</b>      | <b>12.93</b>          |
| Spathulenol                             | 1577            | 2101            | 0.95±0.01            | -                  | -                    | 0.58±0.01             | -                 | -                     |
| Caryophyllene oxide*                    | 1581            | 1955            | 7.71±0.01            | 14.11±0.01         | 6.25±0.01            | 4.59±0.01             | 7.28±0.01         | 4.65±0.01             |
| Viridiflorol                            | 1592            | 2099            | -                    | -                  | 0.91±0.03            | -                     | -                 | -                     |
| $\gamma$ -Eudesmol                      | 1632            | 2175            | -                    | 19.98±0.01         | 0.56±0.01            | 3.16±0.01             | -                 | 0.88±0.01             |
| $\alpha$ -Muurolol                      | 1645            | 2181            | -                    | -                  | -                    | -                     | -                 | 2.38±0.01             |

|                                    |      |      |              |              |              |              |              |              |
|------------------------------------|------|------|--------------|--------------|--------------|--------------|--------------|--------------|
| $\alpha$ -Cadinol                  | 1655 | 2208 | -            | -            | -            | -            | -            | 0.72±0.01    |
| $\alpha$ -Bisabolol                | 1685 | 2210 | 2.12±0.01    | -            | -            | -            | -            | 0.38±0.01    |
| $\alpha$ -Bisabolol oxide          | 1748 | 2511 | 2.77±0.01    | -            | -            | -            | -            | 0.69±0.01    |
| Hexahydrofarnesyl acetone*         | 1839 | 2113 | 15.37±0.01   | 6.35±0.01    | 10.82±0.01   | 28.85±0.01   | 6.86±0.01    | 3.25±0.02    |
| <b>Oxygenated diterpene</b>        |      |      | <b>15.63</b> | <b>7.54</b>  | <b>31.66</b> | <b>18.53</b> | <b>32.61</b> | <b>6.72</b>  |
| Phytol*                            | 1942 | 2610 | 15.63±0.01   | 7.54±0.01    | 31.66±0.01   | 18.53±0.01   | 32.61±0.01   | 6.72±0.01    |
| <b>Phenolic compounds</b>          |      |      | <b>6.9</b>   | <b>6.99</b>  | <b>4.16</b>  | <b>3.25</b>  | <b>-</b>     | <b>-</b>     |
| Thymol*                            | 1289 | 2154 | -            | -            | -            | 0.56±0.1     | -            | -            |
| <i>p</i> -Vinyl guaicol            | 1313 | 2156 | 2.41±0.01    | 3.11±0.01    | 2.64±0.01    | 2.22±0.01    | -            | -            |
| Thymol acetate                     | 1349 | -    | 2.38±0.01    | -            | -            | -            | -            | -            |
| Methyl eugenol                     | 1403 | 2005 | 2.11±0.01    | 2.16±0.02    | 1.52±0.01    | 0.47±0.1     | -            | -            |
| ( <i>Z</i> )-Methyl isoeugenol     | 1451 | 2070 | -            | 1.72±0.01    | -            | -            | -            | -            |
| <b>Acids, alcohols and esters</b>  |      |      | <b>35.73</b> | <b>19.44</b> | <b>24.44</b> | <b>18.84</b> | <b>16.6</b>  | <b>31.97</b> |
| Isopentyl acetate                  | 863  | 1127 | -            | -            | 0.56±0.01    | -            | -            | -            |
| Benzaldehyde                       | 952  | 1508 | 0.32±0.13    | -            | 1.32±0.01    | 3.24±0.01    | 1.84±0.01    | -            |
| 2-Pentyl furan                     | 984  | 1230 | -            | 4.52±0.01    | -            | -            | -            | -            |
| Benzene acetaldehyde               | 1036 | 1633 | 3.97±0.01    | 2.69±0.01    | 7.28±0.01    | -            | 3.34±0.01    | -            |
| <i>n</i> -Nonanal                  | 1100 | 1389 | 2.18±0.01    | 2.91±0.01    | 1.81±0.1     | 2.71±0.01    | -            | -            |
| Hexyl 2-methyl butanoate           | 1233 | 1425 | 2.45±0.01    | -            | -            | -            | -            | -            |
| <i>n</i> -Decanol                  | 1266 | 1711 | 1.88±0.01    | 0.85±0.01    | -            | -            | -            | -            |
| 2,4-Decadienal                     | 1304 | 1764 | 1.45±0.01    | -            | -            | -            | -            | -            |
| ( <i>E</i> )- $\beta$ -Damascenone | 1384 | 1819 | 3.12±0.01    | 2.61±0.01    | 1.22±0.07    | 2.57±0.01    | -            | 0.42±0.03    |
| $\beta$ -Ionone                    | 1487 | 1935 | 17.01±0.01   | 2.69±0.01    | 4.41±0.01    | 3.07±0.01    | 2.18±0.01    | 18.11±0.01   |

|                                 |      |      |              |             |              |              |              |              |
|---------------------------------|------|------|--------------|-------------|--------------|--------------|--------------|--------------|
| Benzyl benzoate                 | 1760 | 2613 | -            | -           | 2.11±0.01    | -            | -            | -            |
| Hexadecanoic acid*              | 1959 | 2912 | 3.35±0.01    | 3.17±0.01   | 5.73±0.01    | 7.25±0.01    | 9.24±0.01    | 13.21±0.01   |
| Oleic acid                      | 2133 | 2998 | -            | -           | -            | -            | -            | 0.23±0.07    |
| Octadecanol acetate             | 2209 | -    | -            | -           | -            | -            | -            | 1.11±0.01    |
| <b>Hydrocarbons</b>             |      |      | <b>0.22</b>  | <b>4.45</b> | <b>6.75</b>  | <b>3.45</b>  | <b>32.9</b>  | <b>38.49</b> |
| Eicosane*                       | 2000 | 2000 | -            | -           | -            | -            | 0.31±0.01    | -            |
| Heneicosane*                    | 2100 | 2100 | -            | 0.88±0.01   | 0.21±0.1     | .            | 0.42±0.07    | 0.34±0.05    |
| Docosane*                       | 2200 | 2200 | 0.22±0.01    | 1.32±0.01   | 3.14±0.01    | 0.81±0.02    | 3.34±0.02    | 2.15±0.01    |
| Tricosane*                      | 2300 | 2300 | -            | 0.65±0.01   | 0.32±0.03    | 0.46±0.01    | 0.53±0.01    | 0.65±0.07    |
| Tetracosane*                    | 2400 | 2400 | -            | 0.89±0.01   | 2.83±0.01    | 0.77±0.01    | 0.45±0.01    | 0.92±0.01    |
| Pentacosane*                    | 2500 | 2500 | -            | 0.71±0.01   | 0.56±0.01    | 0.21±0.03    | 10.47±0.01   | 11.89±0.01   |
| Hexacosane*                     | 2600 | 2600 | -            | -           | 0.22±0.05    | 0.88±0.15    | 12.45±0.01   | 1.52±0.01    |
| Heptacosane*                    | 2700 | 2700 | -            | -           | 2.30±0.01    | 0.32±0.05    | 3.82±0.01    | 20.67±0.01   |
| Octacosane*                     | 2800 | 2800 | -            | -           | -            | -            | 1.11±0.01    | 0.35±0.04    |
| <b>Total identification (%)</b> |      |      | <b>94.88</b> | <b>92.5</b> | <b>94.39</b> | <b>96.28</b> | <b>96.95</b> | <b>93.88</b> |

**Table 5.** Continue

|                                |                 |                 | <i>V. opaca</i> | <i>V. persica</i> | <i>V. polita</i> | <i>V. serpyllifolia</i> | <i>V. urticifolia</i> |
|--------------------------------|-----------------|-----------------|-----------------|-------------------|------------------|-------------------------|-----------------------|
| Component                      | RI <sup>a</sup> | RI <sup>b</sup> | VC±SD           | VC±SD             | VC±SD            | VC±SD                   | VC±SD                 |
| <b>Oxygenated monoterpenes</b> |                 |                 | <b>0.63</b>     | -                 | -                | <b>0.68</b>             | -                     |
| Linalool                       | 1095            | 1506            | 0.42±0.01       | -                 | -                | -                       | -                     |
| Terpinen-4-ol                  | 1174            | 1686            | 0.21±0.04       | -                 | -                | -                       | -                     |
| α-Terpineol                    | 1184            | 1660            | -               | -                 | -                | 0.68±0.01               | -                     |

|                                   |      |      |              |              |              |              |              |
|-----------------------------------|------|------|--------------|--------------|--------------|--------------|--------------|
| <b>Sesquiterpene hydrocarbons</b> |      |      | <b>11.56</b> | <b>17.68</b> | <b>10.36</b> | <b>4.91</b>  | <b>0.6</b>   |
| $\alpha$ -Copaene                 | 1377 | 1484 | -            | -            | -            | -            | -            |
| <i>E</i> -Caryophyllene*          | 1424 | 1585 | 11.23±0.01   | 9.29±0.01    | 6.57 ±0.01   | 2.11±0.01    | 0.43±0.01    |
| <i>allo</i> -Aromadendrene        | 1465 | 1662 | -            | 2.81±0.01    | 0.42±0.01    | 0.28±0.01    | 0.17±0.04    |
| $\beta$ -Chamigrene               | 1478 | 1724 | -            | 2.02±0.01    | -            | -            | -            |
| Germacrene D                      | 1481 | 1692 | 0.33±0.01    | 0.75±0.01    | 1.06±0.03    | 0.67±0.01    | -            |
| $\delta$ -Selinene                | 1492 | 1756 | -            | 2.81±0.01    | 2.31±0.04    | 1.85±0.02    | -            |
| <b>Oxygenated sesquiterpenes</b>  |      |      | <b>35.86</b> | <b>26.34</b> | <b>20.18</b> | <b>13.2</b>  | <b>7.34</b>  |
| Spathulenol                       | 1577 | 2101 | -            | -            | -            | 0.88±0.01    | -            |
| Caryophyllene oxide*              | 1581 | 1955 | 11.75±0.01   | 10.11±0.01   | 7.55±0.01    | 4.19±0.01    | 0.38±0.01    |
| Viridiflorol                      | 1592 | 2099 | -            | -            | 0.87±0.08    | -            | -            |
| $\gamma$ -Eudesmol                | 1632 | 2175 | 4.62±0.01    | 0.72±0.01    | 0.29±0.01    | 0.21±0.01    | -            |
| $\alpha$ -Muurolol                | 1645 | 2181 | 1.73±0.01    | 1.71±0.01    | -            | -            | -            |
| $\alpha$ -Cadinol                 | 1655 | 2208 | 1.06±0.01    | -            | -            | -            | -            |
| $\alpha$ -Bisabolol               | 1685 | 2210 | 4.02±0.01    | 1.23±0.01    | 0.71±0.01    | -            | -            |
| $\alpha$ -Bisabolol oxide         | 1748 | 2511 | 1.21±0.01    | 2.26±0.01    | 0.48±0.01    | -            | -            |
| Hexahydrofarnesyl acetone*        | 1839 | 2113 | 11.47±0.01   | 10.31±0.01   | 10.28±0.01   | 7.92±0.01    | 6.96±0.01    |
| <b>Oxygenated diterpene</b>       |      |      | <b>6.68</b>  | <b>20.21</b> | <b>31.18</b> | <b>39.79</b> | <b>47.55</b> |
| Phytol*                           | 1942 | 2610 | 6.68±0.01    | 20.21±0.01   | 31.18±0.01   | 39.79±0.01   | 47.55±0.01   |
| <b>Phenolic compounds</b>         |      |      | <b>0.75</b>  | <b>5.33</b>  | <b>2.61</b>  | <b>2.09</b>  | <b>-</b>     |
| <i>p</i> -Vinyl guaicol           | 1313 | 2156 | 0.75±0.01    | 3.14±0.01    | 2.26±0.01    | 0.52±0.01    | -            |
| Methyl eugenol                    | 1403 | 2005 | -            | 1.42±0.01    | 0.35±0.01    | 1.57±0.04    | -            |
| ( <i>Z</i> )-Methyl isoeugenol    | 1451 | 2070 | -            | 0.77±0.01    | -            | -            | -            |

| Acids, alcohols and esters         |      |      | 13.04      | 20.2      | 18.21     | 28.54      | 15.83      |
|------------------------------------|------|------|------------|-----------|-----------|------------|------------|
| Benzaldehyde                       | 952  | 1508 | 0.29±0.02  | 0.75±0.01 | 5.47±0.01 | 0.29±0.01  | -          |
| Benzene acetaldehyde               | 1036 | 1633 | 0.45±0.01  | 1.65±0.01 | 1.45±0.01 | 3.92±0.01  | 0.74±0.01  |
| <i>n</i> -Nonanal                  | 1100 | 1389 | 0.21±0.01  | 0.76±0.01 | 0.51±0.1  | 2.78±0.01  | 1.15±0.01  |
| <i>n</i> -Decanol                  | 1266 | 1711 | -          | 1.08±0.01 | 0.43±0.01 | 0.96±0.01  | -          |
| 2,4-Decadienal                     | 1304 | 1764 | -          | 0.44±0.07 | -         | -          | -          |
| ( <i>E</i> )- $\beta$ -Damascenone | 1384 | 1819 | -          | 2.57±0.01 | 0.32±0.04 | 0.77±0.01  | 2.14±0.01  |
| $\beta$ -Ionone                    | 1487 | 1935 | 7.51±0.01  | 5.60±0.01 | 3.28±0.01 | 7.54±0.01  | 0.56±0.01  |
| 1-Hexadecanol                      | 1874 | 2371 | -          | -         | -         | -          | -          |
| Hexadecanoic acid*                 | 1959 | 2912 | 4.58±0.01  | 7.35±0.01 | 6.75±0.01 | 12.28±0.01 | 11.24±0.01 |
| Hydrocarbons                       |      |      | 28.91      | 4.38      | 10.64     | 7.79       | 21.43      |
| Eicosane*                          | 2000 | 2000 | 0.66±0.05  | -         | 0.42±0.05 | -          | 0.39±0.08  |
| Heneicosane*                       | 2100 | 2100 | 0.79±0.01  | 0.37±0.01 | 0.21±0.03 | .          | 0.49±0.01  |
| Docosane*                          | 2200 | 2200 | 7.45±0.01  | 3.10±0.01 | 3.87±0.01 | 2.01±0.01  | 3.33±0.01  |
| Tricosane*                         | 2300 | 2300 | 1.71±0.01  | 0.25±0.01 | 0.37±0.02 | 0.48±0.04  | 1.21±0.01  |
| Tetracosane*                       | 2400 | 2400 | 2.11±0.01  | -         | 0.81±0.01 | 0.77±0.01  | 0.25±0.01  |
| Pentacosane*                       | 2500 | 2500 | 4.14±0.01  | -         | 0.36±0.01 | 0.98±0.01  | 0.48±0.01  |
| Hexacosane*                        | 2600 | 2600 | 0.34±0.01  | -         | 4.27±0.05 | 3.13±0.01  | 0.32±0.05  |
| Heptacosane*                       | 2700 | 2700 | 11.71±0.01 | 0.21±0.01 | 0.33±0.01 | 0.42±0.03  | 13.82±0.01 |
| Octacosane*                        | 2800 | 2800 | -          | 0.45±0.01 | -         | -          | 2.14±0.01  |
| Total identification (%)           |      |      | 97.43      | 94.14     | 93.18     | 97         | 93.15      |

Retention indices (RIs) were determined relative to a series of *n*-alkanes (C8–C40) on capillary columns VF5-ms (RI<sup>a</sup>) and CPWax 52 (RI<sup>b</sup>); Identification method: RI, comparison of RIs with those in a self-generated library reported in the literature [41] and/or with authentic samples; comparison of mass spectra with those in the NIST02 and Wiley 9 mass spectral libraries; \*co-injection with reference compounds; -, not identified; SD, standard deviation of triplicate analysis.
