# Supplementary material for: Hydrodistillation and Microwave Extraction of Volatile Compounds: Comparing Data for Twenty-One Veronica Species from Different Habitats
Source: MDPI journal article supplement (doi:10.3390/plants11070902), 2022-03-28
Supplement: s1 [file s1]

**Table S1.** Chemical composition of the VCs obtained by hydro-distillation from the aerial parts of *Veronica* taxa collected on dry habitats.

| Component                               | RI <sup>a</sup> | RI <sup>b</sup> | <i>V. austriaca</i><br>ssp. <i>austriaca</i> | <i>V. austriaca</i> ssp.<br><i>jacquinii</i> | <i>V. cymbalaria</i> | <i>V. dalmatica.</i> | <i>V. saturejoides</i><br>ssp. <i>satirejoides</i> |
|-----------------------------------------|-----------------|-----------------|----------------------------------------------|----------------------------------------------|----------------------|----------------------|----------------------------------------------------|
|                                         |                 |                 | VC±SD                                        | VC±SD                                        | VC±SD                | VC±SD                | VC±SD                                              |
| <b>Monoterpene hydrocarbons</b>         |                 |                 | <b>0.94</b>                                  | <b>-</b>                                     | <b>-</b>             | <b>0.15</b>          | <b>0.88</b>                                        |
| $\alpha$ -Thujene                       | 924             | 1012            | 0.94±0.01                                    |                                              |                      |                      |                                                    |
| $\alpha$ -Pinene*                       | 935             | 1017            | -                                            | -                                            | -                    | -                    | 0.88±0.01                                          |
| $\beta$ -Phellandrene                   | 1002            | 1195            | -                                            | -                                            | -                    | 0.15±0.03            | -                                                  |
| <b>Oxygenated monoterpenes</b>          |                 |                 | <b>1.09</b>                                  | <b>-</b>                                     | <b>1.97</b>          | <b>15.06</b>         | <b>1.79</b>                                        |
| 1,8-Cineole                             | 1026            | 1210            | 0.83±0.01                                    | -                                            | -                    | 0.76±0.01            | -                                                  |
| $\gamma$ -Terpinene                     | 1057            | 1225            | -                                            | -                                            | -                    | 2.61±0.01            | -                                                  |
| Linalool                                | 1095            | 1506            | 0.26±0.01                                    | -                                            | 0.26±0.01            | 4.72±0.01            | 0.89±0.05                                          |
| <i>allo</i> -Ocimene                    | 1128            | 1390            | -                                            | -                                            | 0.22±0.15            | -                    | -                                                  |
| Camphor                                 | 1151            | 1499            | -                                            | -                                            | -                    | 0.72±0.01            | -                                                  |
| Terpinen-4-ol                           | 1174            | 1686            | -                                            | -                                            | 0.22±0.01            | -                    | -                                                  |
| Borneol                                 | 1176            | 1719            | -                                            | -                                            | -                    | 1.59±0.01            | -                                                  |
| $\alpha$ -Terpineol                     | 1184            | 1660            | -                                            | -                                            | -                    | 3.08±0.03            | 0.28±0.01                                          |
| <i>trans-p</i> -Mentha-1(7),8-dien-2-ol | 1187            | 1803            | -                                            | -                                            | 0.62±0.01            | -                    | 0.62±0.02                                          |
| Menthyl acetate                         | 1294            | 1550            | -                                            | -                                            | 0.65±0.01            | 1.58±0.02            | -                                                  |
| <b>Sesquiterpene hydrocarbons</b>       |                 |                 | <b>7.76</b>                                  | <b>8.01</b>                                  | <b>10.91</b>         | <b>13.55</b>         | <b>16.86</b>                                       |
| $\alpha$ -Copaene                       | 1377            | 1484            | -                                            | -                                            | 0.78±0.01            | -                    | 1.53±0.01                                          |
| <i>E</i> -Caryophyllene*                | 1424            | 1585            | 1.23±0.01                                    | 8.01±0.01                                    | 3.95 ±0.04           | 3.48±0.01            | 9.43±0.01                                          |
| <i>allo</i> -Aromadendrene              | 1465            | 1662            | -                                            | -                                            | 1.32±0.01            | 2.59±0.01            | 1.47±0.01                                          |

|                                   |      |      |              |              |              |              |              |
|-----------------------------------|------|------|--------------|--------------|--------------|--------------|--------------|
| $\beta$ -Chamigrene               | 1478 | 1724 | -            | -            | -            | 0.27±0.12    | -            |
| Germacrene D                      | 1481 | 1692 | 5.28±0.01    | -            | 1.42±0.01    | 3.87±0.02    | 2.61±0.01    |
| $\delta$ -Selinene                | 1492 | 1756 | 1.25±0.01    | -            | 2.32±0.01    | 3.34±0.01    | -            |
| $\delta$ -Cadinene                | 1517 | 1745 | -            | -            | 1.12±0.01    | -            | 1.82±0.01    |
| <b>Oxygenated sesquiterpenes</b>  |      |      | <b>44.63</b> | <b>31.1</b>  | <b>60.16</b> | <b>13.46</b> | <b>52.05</b> |
| Spathulenol                       | 1577 | 2101 | -            | -            | -            | 0.25±0.01    | 1.8±0.01     |
| Caryophyllene oxide*              | 1581 | 1955 | 4.86±0.01    | 13.98±0.01   | 10.92±0.01   | 0.52±0.01    | 34.53±0.01   |
| Viridiflorol                      | 1592 | 2099 | -            | -            | -            | -            | 1.05±0.01    |
| $\gamma$ -Eudesmol                | 1632 | 2175 | -            | -            | 9.61±0.01    | -            | 0.2±0.03     |
| $\alpha$ -Muurolol                | 1645 | 2181 | -            | -            | 3.30±0.01    | 2.38±0.01    | 7.06±0.01    |
| $\alpha$ -Bisabolol               | 1685 | 2210 | -            | -            | -            | 2.59±0.03    | -            |
| $\alpha$ -Bisabolol oxide         | 1748 | 2511 | -            | -            | -            | -            | 0.53±0.01    |
| Hexahydrofarnesyl acetone*        | 1839 | 2113 | 39.77±0.01   | 17.12±0.01   | 36.33±0.01   | 7.72±0.13    | 6.88±0.01    |
| <b>Oxygenated diterpene</b>       |      |      | <b>20.12</b> | <b>4.58</b>  | <b>-</b>     | <b>41.22</b> | <b>-</b>     |
| Phytol*                           | 1942 | 2610 | 20.12±0.01   | 4.58±0.01    | -            | 41.22±0.01   | -            |
| <b>Phenolic compounds</b>         |      |      | <b>-</b>     | <b>0.33</b>  | <b>1.38</b>  | <b>0.85</b>  | <b>-</b>     |
| Thymol*                           | 1289 | 2154 | -            | -            | 0.82±0.01    | -            | -            |
| <i>p</i> -Vinyl guaicol           | 1313 | 2156 | -            | -            | 0.27±0.03    | -            | -            |
| Thymol acetate                    | 1349 | -    | -            | -            | -            | 0.85±0.01    | -            |
| Methyl eugenol                    | 1403 | 2005 | -            | 0.33±0.01    | -            | -            | -            |
| ( <i>Z</i> )-Methyl isoeugenol    | 1451 | 2070 | -            | -            | 0.29±0.01    | -            | -            |
| <b>Acids, alcohols and esters</b> |      |      | <b>13.38</b> | <b>44.19</b> | <b>12.94</b> | <b>8.24</b>  | <b>23.92</b> |
| Isopentyl acetate                 | 863  | 1127 | -            | -            | -            | 0.24±0.09    | 0.28±0.01    |

|                                    |      |      |              |              |              |              |              |
|------------------------------------|------|------|--------------|--------------|--------------|--------------|--------------|
| Benzaldehyde                       | 952  | 1508 | -            | -            | 0.98±0.01    | 1.25±0.01    | 3.98±0.01    |
| Benzene acetaldehyde               | 1036 | 1633 | -            | -            | 0.48±0.01    | -            | 1.12±0.01    |
| <i>n</i> -Nonanal                  | 1100 | 1389 | -            | -            | 0.89±0.02    | -            | 1.68±0.01    |
| Hexyl 2-methyl butanoate           | 1233 | 1425 | -            | -            | -            | 0.21±0.01    | -            |
| <i>n</i> -Decanol                  | 1266 | 1711 | -            | -            | 0.11±0.05    | -            | 0.98±0.01    |
| 2,4-Decadienal                     | 1304 | 1764 | 2.23±0.01    | -            | -            | -            | 4.25±0.01    |
| ( <i>E</i> )- $\beta$ -Damascenone | 1384 | 1819 | -            | -            | -            | 0.69±0.01    | -            |
| $\beta$ -Ionone                    | 1487 | 1935 | -            | -            | 7.28±0.01    | 3.27±0.01    | 3.98±0.01    |
| Benzyl benzoate                    | 1760 | 2613 | -            | -            | 1.56±0.01    | -            | -            |
| 1-Hexadecanol                      | 1874 | 2371 | -            | -            | 0.89±0.01    | 1.45±0.01    | 1.51±0.03    |
| Hexadecanoic acid*                 | 1959 | 2912 | 11.15±0.01   | 32.17±0.01   | 0.75±0.01    | 1.13±0.01    | 6.14±0.01    |
| Oleic acid                         | 2133 | 2998 | -            | 12.02±0.01   | -            | -            | -            |
| Octadecanol acetate                | 2209 | -    | -            | 0.98±0.01    | -            | -            | -            |
| <b>Hydrocarbons</b>                |      |      | <b>8.35</b>  | <b>5.94</b>  | <b>5.89</b>  | <b>6.96</b>  | <b>1.12</b>  |
| Eicosane*                          | 2000 | 2000 | -            | 1.39±0.01    | 1.24±0.01    | -            | 1.12±0.01    |
| Heneicosane*                       | 2100 | 2100 | -            | 0.83±0.01    | 0.98±0.17    | 0.87±0.01    | -            |
| Docosane*                          | 2200 | 2200 | -            | 2.69±0.01    | 2.13±0.01    | 2.11±0.01    | -            |
| Tricosane*                         | 2300 | 2300 | -            | -            | -            | 1.96±0.01    | -            |
| Tetracosane*                       | 2400 | 2400 | -            | -            | 0.83±0.01    | 1.77±0.01    | -            |
| Pentacosane*                       | 2500 | 2500 | 3.92±0.01    | 1.03±0.01    | 0.71±0.04    | 0.25±0.03    | -            |
| Heptacosane*                       | 2700 | 2700 | 3.74±0.01    | -            | -            | -            | -            |
| Octacosane*                        | 2800 | 2800 | 0.69±0.01    | -            | -            | -            | -            |
| <b>Total identification (%)</b>    |      |      | <b>96.27</b> | <b>94.15</b> | <b>93.25</b> | <b>92.53</b> | <b>96.62</b> |

Retention indices (RIs) were determined relative to a series of n-alkanes (C8–C40) on capillary columns VF5-ms (RI<sup>a</sup>) and CPWax 52 (RI<sup>b</sup>); Identification method: RI, comparison of RIs with those in a self-generated library reported in the literature [41] and/or with authentic samples; comparison of mass spectra with those in the NIST02 and Wiley 9 mass spectral libraries; \*co-injection with reference compounds; -, not identified; SD, standard deviation of triplicate analysis.
