# Supplementary material for: Hydrodistillation and Microwave Extraction of Volatile Compounds: Comparing Data for Twenty-One Veronica Species from Different Habitats
Source: MDPI journal article supplement (doi:10.3390/plants11070902), 2022-03-28
Supplement: s1 [file s1]

**Table S3.** Chemical composition of the VCs obtained by hydro-distillation from the aerial parts of *Veronica* taxa collected on wet habitats.

| Component                               | <i>V. anagallis-aquatica</i> |                 | <i>V. anagalloides</i> | <i>V. beccabunga</i> | <i>V. catenata</i> | <i>V. longifolia</i> |
|-----------------------------------------|------------------------------|-----------------|------------------------|----------------------|--------------------|----------------------|
|                                         | RI <sup>a</sup>              | RI <sup>b</sup> | VC±SD                  | VC±SD                | VC±SD              | VC±SD                |
| <b>Monoterpene hydrocarbons</b>         |                              |                 | <b>1.42</b>            | -                    | -                  | -                    |
| β -Phellandrene                         | 1002                         | 1195            | 1.42±0.01              | -                    | -                  | -                    |
| <b>Oxygenated monoterpenes</b>          |                              |                 | <b>5.75</b>            | <b>5.57</b>          | <b>8.33</b>        | <b>-</b>             |
| 1,8-Cineole                             | 1026                         | 1210            | 1.83±0.01              | -                    | -                  | -                    |
| γ-Terpinene                             | 1057                         | 1225            | 0.49±0.05              | 2.53±0.01            | -                  | -                    |
| Linalool                                | 1095                         | 1506            | 1.21±0.01              | 1.71±0.01            | -                  | 0.65±0.01            |
| Terpinen-4-ol                           | 1174                         | 1686            | -                      | 0.68±0.1             | -                  | -                    |
| α-Terpineol                             | 1184                         | 1660            | -                      | -                    | -                  | 0.82±0.07            |
| <i>trans-p</i> -Mentha-1(7),8-dien-2-ol | 1187                         | 1803            | 2.22±0.01              | 0.65±0.04            | 1.85±0.01          | 1.55±0.01            |
| Piperitone                              | 1250                         | 1719            | -                      | -                    | 5.79±0.01          | -                    |
| Menthyl acetate                         | 1294                         | 1550            | -                      | -                    | 0.69±0.01          | -                    |
| <b>Sesquiterpene hydrocarbons</b>       |                              |                 | <b>10.27</b>           | <b>11.59</b>         | <b>3.89</b>        | <b>12.55</b>         |
| α-Copaene                               | 1377                         | 1484            | -                      | -                    | -                  | -                    |
| <i>E</i> -Caryophyllene*                | 1424                         | 1585            | 5.49±0.01              | 4.07±0.01            | 2.75 ±0.01         | 4.11±0.02            |
| <i>allo</i> -Aromadendrene              | 1465                         | 1662            | 1.10±0.03              | 2.00±0.01            | 0.72±0.01          | 1.23±0.01            |
| β-Chamigrene                            | 1478                         | 1724            | -                      | -                    | -                  | 0.29±0.01            |
| Germacrene D                            | 1481                         | 1692            | 1.28±0.01              | 2.22±0.15            | 0.42±0.01          | 3.87±0.02            |
| δ-Selinene                              | 1492                         | 1756            | 0.65±0.01              | 1.15±0.01            | -                  | 3.34±0.01            |
| δ-Cadinene                              | 1517                         | 1745            | 1.75±0.01              | 2.15±0.1             | -                  | 2.35±0.01            |
| <b>Oxygenated sesquiterpenes</b>        |                              |                 | <b>32.18</b>           | <b>24.47</b>         | <b>11.06</b>       | <b>19.82</b>         |

|                                   |      |      |              |              |              |              |              |
|-----------------------------------|------|------|--------------|--------------|--------------|--------------|--------------|
| Spathulenol                       | 1577 | 2101 | 0.65±0.01    | 2.85±0.01    | -            | 0.55±0.01    | 2.56±0.01    |
| Caryophyllene oxide*              | 1581 | 1955 | 4.36±0.01    | 4.91±0.01    | 4.22±0.01    | 1.55±0.01    | 5.58±0.01    |
| Viridiflorol                      | 1592 | 2099 | -            | -            | 0.60±0.16    | -            | 1.75±0.01    |
| γ-Eudesmol                        | 1632 | 2175 | -            | -            | 0.11±0.01    | -            | -            |
| α-Muurolol                        | 1645 | 2181 | -            | -            | -            | -            | 0.55±0.01    |
| α-Bisabolol                       | 1685 | 2210 | -            | 1.66±0.01    | -            | -            | -            |
| α-Bisabolol oxide                 | 1748 | 2511 | -            | 0.72±0.09    | -            | -            | -            |
| Hexahydrofarnesyl acetone*        | 1839 | 2113 | 27.17±0.01   | 14.33±0.01   | 6.13±0.01    | 17.75±0.02   | 9.08±0.01    |
| <b>Oxygenated diterpene</b>       |      |      | <b>9.42</b>  | <b>9.58</b>  | <b>27.31</b> | <b>29.92</b> | <b>13.63</b> |
| Phytol*                           | 1942 | 2610 | 9.42±0.01    | 9.58±0.01    | 27.31±0.01   | 29.92±0.01   | 13.63±0.01   |
| <b>Phenolic compounds</b>         |      |      | <b>7.42</b>  | <b>5.27</b>  | <b>0.30</b>  | <b>-</b>     | <b>-</b>     |
| Thymol*                           | 1289 | 2154 | -            | -            | -            | -            | -            |
| <i>p</i> -Vinyl guaicol           | 1313 | 2156 | 2.46±0.01    | -            | -            | -            | -            |
| Methyl eugenol                    | 1403 | 2005 | 4.96±0.01    | 2.66±0.04    | 0.30±0.01    | -            | -            |
| ( <i>Z</i> )-Methyl isoeugenol    | 1451 | 2070 | -            | 2.61±0.01    | -            | -            | -            |
| <b>Acids, alcohols and esters</b> |      |      | <b>20.98</b> | <b>31.14</b> | <b>8.97</b>  | <b>16.29</b> | <b>27.57</b> |
| Isopentyl acetate                 | 863  | 1127 | -            | -            | -            | -            | -            |
| Benzaldehyde                      | 952  | 1508 | 2.78±0.01    | -            | -            | 0.25±0.01    | 0.91±0.01    |
| Benzene acetaldehyde              | 1036 | 1633 | 4.27±0.01    | 6.62±0.01    | 1.58±0.01    | -            | 1.19±0.01    |
| <i>n</i> -Nonanal                 | 1100 | 1389 | -            | 3.08±0.01    | 2.85±0.02    | 1.65±0.04    | 8.18±0.01    |
| Hexyl 2-methyl butanoate          | 1233 | 1425 | -            | 2.03±0.03    | -            | -            | -            |
| <i>n</i> -Decanol                 | 1266 | 1711 | 0.68±0.01    | -            | -            | -            | 0.45±0.01    |
| 2,4-Decadienal                    | 1304 | 1764 | 2.23±0.01    | -            | -            | -            | -            |

|                                    |      |      |                 |                  |                  |                  |                 |
|------------------------------------|------|------|-----------------|------------------|------------------|------------------|-----------------|
| ( <i>E</i> )- $\beta$ -Damascenone | 1384 | 1819 | 1.96 $\pm$ 0.01 | 3.78 $\pm$ 0.01  | -                | -                | -               |
| $\beta$ -Ionone                    | 1487 | 1935 | 4.41 $\pm$ 0.01 | 1.62 $\pm$ 0.01  | 1.28 $\pm$ 0.01  | 4.37 $\pm$ 0.01  | 7.10 $\pm$ 0.01 |
| Benzyl benzoate                    | 1760 | 2613 | -               | -                | 0.56 $\pm$ 0.15  | -                | -               |
| Hexadecanoic acid*                 | 1959 | 2912 | 4.65 $\pm$ 0.01 | 13.67 $\pm$ 0.01 | 2.72 $\pm$ 0.01  | 10.02 $\pm$ 0.01 | 9.74 $\pm$ 0.01 |
| Oleic acid                         | 2133 | 2998 | -               | 0.34 $\pm$ 0.03  | -                | -                | -               |
| <b>Hydrocarbons</b>                |      |      | <b>7.54</b>     | <b>5.92</b>      | <b>36.62</b>     | <b>16.22</b>     | <b>15.78</b>    |
| Eicosane*                          | 2000 | 2000 | -               | -                | 1.64 $\pm$ 0.01  | -                | -               |
| Heneicosane*                       | 2100 | 2100 | -               | -                | 0.98 $\pm$ 0.17  | .                | -               |
| Docosane*                          | 2200 | 2200 | 3.72 $\pm$ 0.01 | 3.91 $\pm$ 0.01  | 0.13 $\pm$ 0.01  | 3.11 $\pm$ 0.03  | 4.32 $\pm$ 0.07 |
| Tricosane*                         | 2300 | 2300 | 1.69 $\pm$ 0.04 | -                | 1.18 $\pm$ 0.02  | 4.16 $\pm$ 0.01  | 1.28 $\pm$ 0.15 |
| Tetracosane*                       | 2400 | 2400 | 0.35 $\pm$ 0.02 | -                | 0.83 $\pm$ 0.01  | 3.79 $\pm$ 0.01  | 1.29 $\pm$ 0.01 |
| Pentacosane*                       | 2500 | 2500 | -               | 2.01 $\pm$ 0.01  | 0.51 $\pm$ 0.04  | 0.28 $\pm$ 0.1   | 6.81 $\pm$ 0.01 |
| Hexacosane*                        | 2600 | 2600 | -               | -                | 16.21 $\pm$ 0.01 | -                | 2.08 $\pm$ 0.17 |
| Heptacosane*                       | 2700 | 2700 | 0178 $\pm$ 0.02 | -                | 14.89 $\pm$ 0.01 | 4.88 $\pm$ 0.04  | -               |
| Octacosane*                        | 2800 | 2800 | -               | -                | 0.25 $\pm$ 0.02  | -                | -               |
| <b>Total identification (%)</b>    |      |      | <b>94.98</b>    | <b>93.54</b>     | <b>96.78</b>     | <b>94.8</b>      | <b>96.82</b>    |

Retention indices (RIs) were determined relative to a series of n-alkanes (C8–C40) on capillary columns VF5-ms (RI<sup>a</sup>) and CPWax 52 (RI<sup>b</sup>); Identification method: RI, comparison of RIs with those in a self-generated library reported in the literature [41] and/or with authentic samples; comparison of mass spectra with those in the NIST02 and Wiley 9 mass spectral libraries; \*co-injection with reference compounds; -, not identified; SD, standard deviation of triplicate analysis.
