# Supplementary material for: Hydrodistillation and Microwave Extraction of Volatile Compounds: Comparing Data for Twenty-One Veronica Species from Different Habitats
Source: MDPI journal article supplement (doi:10.3390/plants11070902), 2022-03-28
Supplement: s1 [file s1]

**Table S2.** Chemical composition of the VCs obtained by microwave extraction from the aerial parts of *Veronica* taxa collected on dry habitats.

| Table S2. Chemical composition of the VCs obtained by microwave extraction from the aerial parts of <i>Veronica</i> taxa collected on dry habitats. |                 |                 |                                              |                                              |                      |                     |                                                    |
|-----------------------------------------------------------------------------------------------------------------------------------------------------|-----------------|-----------------|----------------------------------------------|----------------------------------------------|----------------------|---------------------|----------------------------------------------------|
|                                                                                                                                                     |                 |                 | <i>V. austriaca</i> ssp.<br><i>austriaca</i> | <i>V. austriaca</i> ssp.<br><i>jacquinii</i> | <i>V. cymbalaria</i> | <i>V. dalmatica</i> | <i>V. saturejoides</i> ssp.<br><i>saturejoides</i> |
| Component                                                                                                                                           | RI <sup>a</sup> | RI <sup>b</sup> | VC±SD                                        | VC±SD                                        | VC±SD                | VC±SD               | VC±SD                                              |
| <b>Monoterpene hydrocarbons</b>                                                                                                                     |                 |                 | <b>1.69</b>                                  | <b>1.93</b>                                  | <b>-</b>             | <b>-</b>            | <b>1.18</b>                                        |
| $\alpha$ -Thujene                                                                                                                                   | 924             | 1012            | 1.69±0.01                                    | -                                            | -                    | -                   | -                                                  |
| $\alpha$ -Pinene*                                                                                                                                   | 935             | 1017            | -                                            | 1.93±0.01                                    | -                    | -                   | 1.18±0.01                                          |
| <b>Oxygenated monoterpenes</b>                                                                                                                      |                 |                 | <b>-</b>                                     | <b>0.87</b>                                  | <b>1.62</b>          | <b>3</b>            | <b>4.6</b>                                         |
| Linalool                                                                                                                                            | 1095            | 1506            | -                                            | 0.87±0.01                                    | 0.96±0.15            | 1.22±0.01           | 1.78±0.02                                          |
| Camphor                                                                                                                                             | 1151            | 1499            | -                                            | -                                            | -                    | -                   | 0.52±0.01                                          |
| $\alpha$ -Terpineol                                                                                                                                 | 1184            | 1660            | -                                            | -                                            | -                    | 1.78±0.13           | 0.88±0.01                                          |
| <i>trans-p</i> -Mentha-1(7),8-dien-2-ol                                                                                                             | 1187            | 1803            | -                                            | -                                            | -                    | -                   | 1.42±0.03                                          |
| Menthyl acetate                                                                                                                                     | 1294            | 1550            | -                                            | -                                            | 0.66±0.07            | -                   | -                                                  |
| <b>Sesquiterpene hydrocarbons</b>                                                                                                                   |                 |                 | <b>6.01</b>                                  | <b>2.78</b>                                  | <b>13.7</b>          | <b>57.8</b>         | <b>17.43</b>                                       |
| $\alpha$ -Copaene                                                                                                                                   | 1377            | 1484            | 0.57±0.03                                    | -                                            | -                    | -                   | 0.89±0.03                                          |
| <i>E</i> -Caryophyllene*                                                                                                                            | 1424            | 1585            | 0.66±0.08                                    | 1.79±0.01                                    | 6.13 ±0.01           | 39.53±0.01          | 8.49±0.01                                          |
| <i>allo</i> -Aromadendrene                                                                                                                          | 1465            | 1662            | -                                            | -                                            | 2.28±0.01            | 15.43±0.01          | -                                                  |
| Germacrene D                                                                                                                                        | 1481            | 1692            | 1.01±0.01                                    | 0.68±0.01                                    | 2.34±0.03            | 1.89±0.01           | 5.11±0.01                                          |
| $\delta$ -Selinene                                                                                                                                  | 1492            | 1756            | 3.77±0.01                                    | 0.31±0.1                                     | 1.52±0.01            | 0.95±0.01           | 1.73±0.01                                          |
| $\delta$ -Cadinene                                                                                                                                  | 1517            | 1745            | -                                            | -                                            | 1.43±0.01            | -                   | 1.21±0.01                                          |
| <b>Oxygenated sesquiterpenes</b>                                                                                                                    |                 |                 | <b>12.74</b>                                 | <b>15.25</b>                                 | <b>47.69</b>         | <b>15.72</b>        | <b>29.05</b>                                       |
| Spathulenol                                                                                                                                         | 1577            | 2101            | -                                            | -                                            | -                    | 4.76±0.01           | 2.25±0.04                                          |
| Caryophyllene oxide*                                                                                                                                | 1581            | 1955            | 2.97±0.01                                    | 6.64±0.01                                    | 32.72±0.01           | 7.52±0.15           | 8.43±0.01                                          |

|                                   |      |      |              |              |              |              |              |
|-----------------------------------|------|------|--------------|--------------|--------------|--------------|--------------|
| Viridiflorol                      | 1592 | 2099 | -            | -            | -            | -            | 0.65±0.02    |
| γ-Eudesmol                        | 1632 | 2175 | -            | -            | 0.61±0.07    | -            | -            |
| α-Bisabolol                       | 1685 | 2210 | -            | -            | 1.01±0.01    | -            | -            |
| Hexahydrofarnesyl acetone*        | 1839 | 2113 | 9.77±0.01    | 8.61±0.01    | 13.35±0.01   | 3.44±0.02    | 17.72±0.01   |
| <b>Oxygenated diterpene</b>       |      |      | <b>24.21</b> | <b>6.58</b>  | <b>3.71</b>  | <b>2.75</b>  | <b>22.47</b> |
| Phytol*                           | 1942 | 2610 | 24.21±0.01   | 6.58±0.01    | 3.71±0.01    | 2.75±0.02    | 22.47±0.01   |
| <b>Phenolic compounds</b>         |      |      | <b>-</b>     | <b>-</b>     | <b>1.44</b>  | <b>-</b>     | <b>-</b>     |
| Thymol*                           | 1289 | 2154 | -            | -            | 0.45±0.01    | -            | -            |
| (Z)-Methyl isoeugenol             | 1451 | 2070 | -            | -            | 0.99±0.16    | -            | -            |
| <b>Acids, alcohols and esters</b> |      |      | <b>7.72</b>  | <b>24.99</b> | <b>26.21</b> | <b>12.28</b> | <b>16.21</b> |
| Isopentyl acetate                 | 863  | 1127 | -            | -            | -            | -            | 0.56±0.09    |
| Benzaldehyde                      | 952  | 1508 | 2.37±0.01    | -            | 1.24±0.01    | -            | 1.48±0.01    |
| Benzene acetaldehyde              | 1036 | 1633 | -            | -            | 0.42±0.01    | 0.75±0.01    | 1.02±0.01    |
| <i>n</i> -Nonanal                 | 1100 | 1389 | 0.83±0.02    | -            | -            | 1.68±0.01    | 1.14±0.18    |
| Hexyl 2-methyl butanoate          | 1233 | 1425 | -            | -            | -            | 0.91±0.01    | -            |
| <i>n</i> -Decanol                 | 1266 | 1711 | -            | 1.52±0.05    | -            | -            | 1.88±0.01    |
| 2,4-Decadienal                    | 1304 | 1764 | -            | -            | -            | -            | 0.55±0.01    |
| ( <i>E</i> )-β-Damascenone        | 1384 | 1819 | -            | -            | -            | 0.29±0.06    | -            |
| β-Ionone                          | 1487 | 1935 | -            | 1.01±0.03    | 7.88±0.01    | 6.00±0.01    | 1.84±0.03    |
| Benzyl benzoate                   | 1760 | 2613 | -            | -            | -            | -            | -            |
| 1-Hexadecanol                     | 1874 | 2371 | -            | -            | 0.64±0.13    | -            | 1.1±0.01     |
| Hexadecanoic acid*                | 1959 | 2912 | 4.15±0.01    | 22.17±0.01   | 15.72±0.01   | 2.65±0.01    | 6.64±0.01    |
| Oleic acid                        | 2133 | 2998 | 0.37±0.01    | 0.29±0.01    | 0.31±0.01    | -            | -            |

| Hydrocarbons             |      |      | 40.65      | 41.99      | 2.5       | 5.46      | 5.86      |
|--------------------------|------|------|------------|------------|-----------|-----------|-----------|
| Eicosane*                | 2000 | 2000 | 1.84±0.01  | 1.12±0.01  | 0.24±0.01 | 1.51±0.04 | 0.12±0.01 |
| Heneicosane*             | 2100 | 2100 | 0.77±0.04  | 0.44±0.02  | 0.88±0.01 | 0.87±0.01 | 2.89±0.01 |
| Docosane*                | 2200 | 2200 | 1.17±0.05  | 1.63±0.1   | -         | 0.48±0.06 | 1.59±0.01 |
| Tricosane*               | 2300 | 2300 | 13.61±0.01 | 17.32±0.01 | -         | 1.13±0.01 | 0.43±0.03 |
| Tetracosane*             | 2400 | 2400 | 3.65±0.01  | 1.61±0.05  | 0.89±0.01 | 1.12±0.01 | 0.35±0.07 |
| Pentacosane*             | 2500 | 2500 | 1.37±0.02  | 5.91±0.01  | 0.49±0.05 | 0.35±0.23 | 0.48±0.01 |
| Hexacosane*              | 2600 | 2600 | 9.29±0.01  | 8.97±0.01  | -         | -         | -         |
| Heptacosane*             | 2700 | 2700 | 8.95±0.02  | 4.11±0.15  | -         | -         | -         |
| Octacosane*              | 2800 | 2800 | -          | 0.88±0.01  | -         | -         | -         |
| Total identification (%) |      |      | 93.02      | 94.39      | 96.87     | 97.01     | 96.8      |

Retention indices (RIs) were determined relative to a series of n-alkanes (C8–C40) on capillary columns VF5-ms (RI<sup>a</sup>) and CPWax 52 (RI<sup>b</sup>); Identification method: RI, comparison of RIs with those in a self-generated library reported in the literature [41] and/or with authentic samples; comparison of mass spectra with those in the NIST02 and Wiley 9 mass spectral libraries; \*co-injection with reference compounds; -, not identified; SD, standard deviation of triplicate analysis.
